# Supplementary material
Source: ML conference proceedings conference paper supplement (https://openaccess.thecvf.com/content/WACV_2020/html/Innmann_NRMVS_Non-Rigid_Multi-view_WACV_2020_paper.html)
Supplement: Supplementary file 1 [file Innmann_NRMVS_Non-Rigid_Multi-view_WACV_2020_supplemental.pdf]

Archive with 2 entries (2 files):
- 300-supp.mp4
- 300-supp.pdf
