# Supplementary material
Source: ML conference proceedings conference paper supplement (https://openaccess.thecvf.com/content/WACV_2020/html/Innmann_NRMVS_Non-Rigid_Multi-view_WACV_2020_paper.html)
Supplement: Supplementary file 1 [file Innmann_NRMVS_Non-Rigid_Multi-view_WACV_2020_supplemental.pdf › 300-supp.pdf]

# NRMVS: Non-Rigid Multi-View Stereo – Supplementary Document

Matthias Innmann<sup>1,2\*</sup> Kihwan Kim<sup>1</sup> Jinwei Gu<sup>1,3\*</sup> Matthias Nießner<sup>4</sup>  
Charles Loop<sup>1</sup> Marc Stamminger<sup>2</sup> Jan Kautz<sup>1</sup>

<sup>1</sup>NVIDIA <sup>2</sup>Friedrich-Alexander University Erlangen-Nürnberg <sup>3</sup>SenseTime <sup>4</sup>Technical University of Munich

In this document, we provide additional details, discussions, and experiments to support the original submission. First, we give an overview of the mathematical symbols used in the original draft (Sec. 1). In Sec 2, we enumerate the parameters that we used for the optimization and Patch-match steps shown in Sec 3.2 of the original submission. In Sec. 3, we show additional implementation details as well as extra experiments for our pre-processing steps (Sec. 3.3, Sec. 3.4), and show how our optimization effects the photometric consistency. In Sec. 3.2, we discuss the runtime of our approach. Finally, in Sec. 4, we provide extra experimental results in both qualitative and quantitative manners.

Note that we demonstrate various 4D animation examples created from few images by using our NRMVS framework in the attached **supplementary video**.

## 1. List of Mathematical Symbols

| Symbol                   | Description                                              |
|--------------------------|----------------------------------------------------------|
| $\mathbf{D}_i$           | deformation from canonical pose to image $i$             |
| $\mathbf{v}, \mathbf{x}$ | point in $\mathbb{R}^3$                                  |
| $\mathbf{n}$             | normal vector in $\mathbb{R}^3$                          |
| $\mathbf{u}_i$           | SIFT keypoint in image $i$                               |
| $C_i$                    | consistency mask $\in \{0, 1\}$ for point $\mathbf{x}_i$ |
| $\rho_{r,s}$             | weighted NCC value for images $r$ and $s$ [5]            |
| $\mathbf{I}_i$           | greyscale image $i$                                      |
| $d_i$                    | depthmap for image $i$                                   |

## 2. Parameter choices

| Parameter           | Value             |
|---------------------|-------------------|
| $w_{\text{sparse}}$ | 1000              |
| $w_{\text{dense}}$  | 0.01              |
| $w_{\text{reg}}$    | 10                |
| $d_{\text{max}}$    | 0.1 cm ... 0.5 cm |
| $\rho_{\text{max}}$ | 0.9               |
| $\tau$              | 0.9               |

$d_{\text{max}}$  is chosen depending on the scale of the scene geom-

etry; e.g., we choose 0.1 cm for the face example and 0.5 cm for the globe example. In case of the synthetic ground truth data, we use  $d_{\text{max}} = 0.01$ , with the rendered plane having a size of 6.

The parameter `filter_min_num_consistent` in the implementation of COLMAP’s PatchMatch [5] as well as our non-rigid PatchMatch is set to 1 (default 2). Besides that, we use COLMAP’s default parameters throughout our pipeline.

## 3. Approach

### 3.1. Deformation Estimation

In Fig. 1, we show an example of the photometric consistency before and after the estimation of the non-rigid deformation. As shown, the photometric error gets reduced and some inconsistent regions (not satisfying a user-specified threshold  $\rho_{\text{max}}$ ) get masked out by the consistency map  $C_i$ .

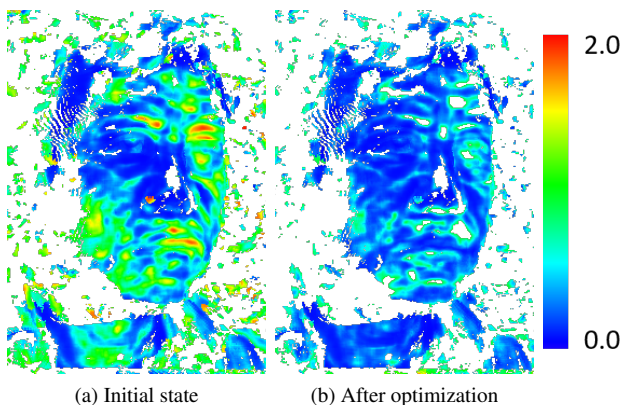

Figure 1: Photoconsistency cost including consistency mask  $C_i \cdot (1 - \text{NCC})$  between Fig. 4(a) and (c). Masked out pixels are transparent in (b).

Fig. 2 shows a visualization of the reconstruction along with the deformation nodes for the globe example. The color is based on the id and is used to indicate corresponding nodes.

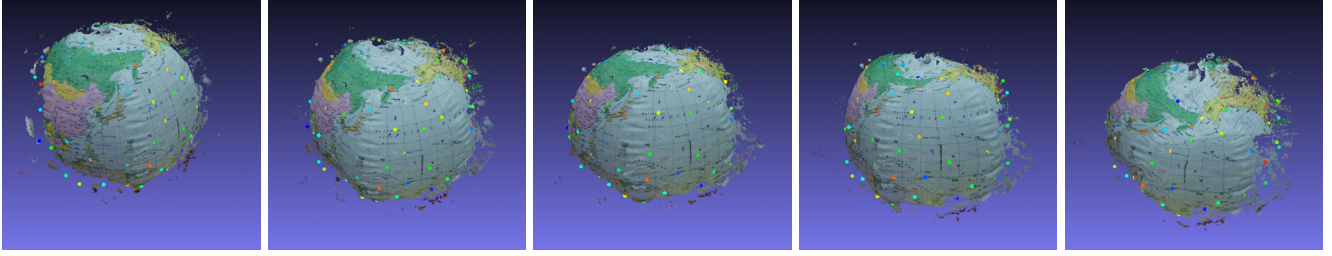

Figure 2: **Visualization of deformation graph:** For the globe example, we show the deformation nodes and their movement across the different views.

### 3.2. Performance

In Table 1, we report the run-time for the face example (Fig. 4) with 100 deformation nodes, depending on the number of iterations  $N$  used for the sparse correspondence association.

| Step     | Time ( $N = 1$ ) | Time ( $N = 5$ ) |
|----------|------------------|------------------|
| Total    | 154 min          | 422 min          |
| Filter   | 0.2%             | 0.4%             |
| Optimize | 92.3%            | 96.9%            |
| Depth    | 7.5%             | 2.7%             |

Table 1: Computation time (in minutes) needed for different steps to process the example in Fig. 4 depending on the number of iterations  $N$  (see main paper for more details): Filtering of sparse correspondences, Joint hierarchical optimization and depth estimation; file I/O not included.

### 3.3. Camera Pose Estimation

In Fig. 3, we show an example result for the estimated camera poses using Agisoft PhotoScan [1]. As can be seen, the camera poses for the input images have been successfully recovered.

### 3.4. Canonical View Selection

To pick the canonical views, we analyze how many matches result in a faithful static reconstruction. I.e., we triangulate each match (after doing the ratio test with  $r = 0.7$  [4]) and reject those with a reprojection error above 1 pixel. As can be seen in Table 3, the image pair (a)-(b) dominates the ratio of static inliers. Therefore, our algorithm chooses these views to reconstruct the initial canonical surface.

## 4. Additional Results

### 4.1. Quantitative Evaluation

In Table 2, we provide further evaluation of our method for ground truth data. In addition to the measurements pro-

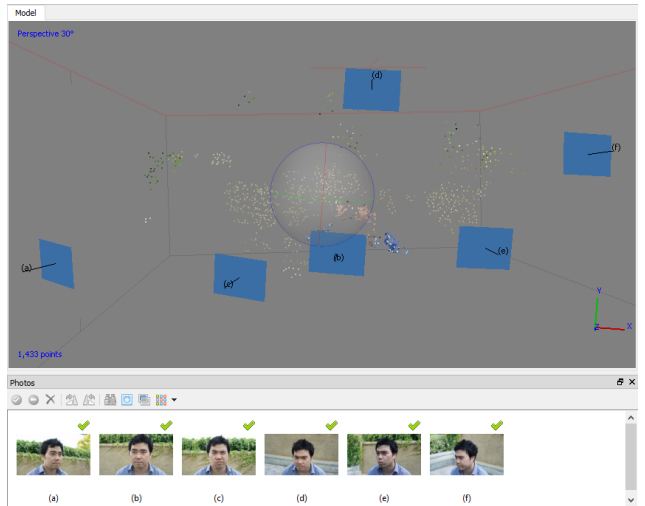

Figure 3: Screenshot of Agisoft PhotoScan

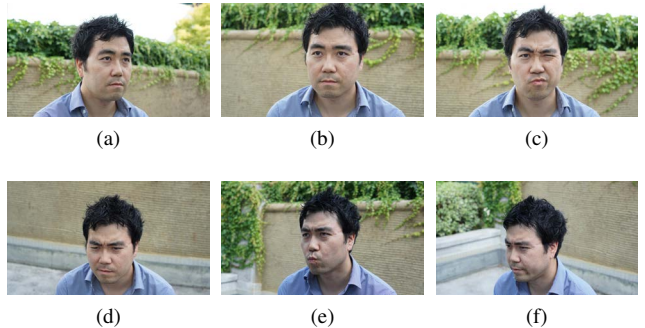

Figure 4: Input images for the face example

vided in the main paper, we compute the mean relative depth error (MRE) without rejecting outliers; i.e., resulting in depth images with a completeness of 100%.

### 4.2. Comparison against State-of-the-Art MVS

In Fig. 6, we show an example result comparing our algorithm with a state-of-the-art MVS approach that performs

Table 2: **Evaluation for ground truth data:** (a) using COLMAP, i.e., assuming a static scene, (b) applying our dense photometric optimization on top of an implementation of non-rigid ICP (NRICP), and (c) using different variants of our algorithm. S denotes *sparse*, D denotes *dense*, photometric objective.  $N$  equals the number of iterations for sparse correspondence association (see paper for more details). We compute the mean relative error (MRE) for all reconstructed values as well as the overall completeness. The last row (w/o filter) shows the MRE, with disabled rejection of outlier depth values, i.e., a completeness of 100 %.

|                | COLMAP [5] | NRICP [3] | Ours          |                |         |                   |                    |
|----------------|------------|-----------|---------------|----------------|---------|-------------------|--------------------|
|                |            |           | S ( $N = 1$ ) | S ( $N = 10$ ) | D       | S ( $N = 1$ ) + D | S ( $N = 10$ ) + D |
| Completeness   | 68.74 %    | 99.30 %   | 97.24 %       | 97.71 %        | 96.41 % | 98.76 %           | <b>98.99 %</b>     |
| MRE            | 2.11 %     | 0.53 %    | 1.48 %        | 1.50 %         | 2.37 %  | 1.12 %            | <b>1.11 %</b>      |
| MRE w/o filter | 6.78 %     | 0.74 %    | 2.16 %        | 2.05 %         | 3.32 %  | 1.63 %            | <b>1.34 %</b>      |

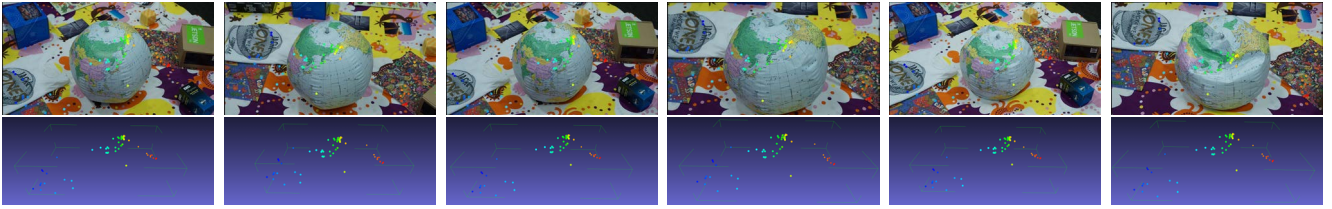

Figure 5: **Comparison against NRSfM:** We run the globe dataset on an NRSfM method (Dai et al. [2])

|     | (b)          | (c)   | (d)   | (e)   | (f)   |
|-----|--------------|-------|-------|-------|-------|
| (a) | <b>10.3%</b> | 0.42% | 0.00% | 0.00% | 0.83% |
| (b) |              | 0.17% | 0.24% | 1.14% | 0.00% |
| (c) |              |       | 0.00% | 0.00% | 0.65% |
| (d) |              |       |       | 0.28% | 0.88% |
| (e) |              |       |       |       | 0.26% |

Table 3: Confusion matrix for static inlier ratio for all 2-view combinations (see Fig. 4).

best in a recent survey [6]. As can be seen, the geometry of the deforming region can not be reconstructed successfully, if the method assumes static geometry.

### 4.3. Comparison against NRSfM

In Fig. 5, we run one of our datasets (globe) on the prior-free NRSfM method of Dai et al. [2]. It is, however, intended to be run on videos of  $\approx 300$  frames with  $\approx 40$  feature tracks that are visible throughout the sequence. As can be seen, the reconstruction result differs from our objective as both only a sparse set of points is reconstructed and the points do not accurately resemble the 3D geometry. This example result illustrates that common NRSfM methods are not applicable out of the box to our kind of setup and input data.

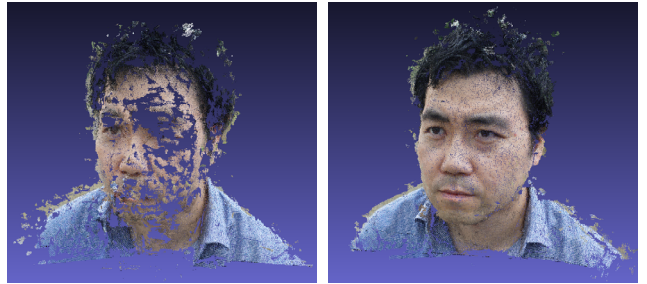

(a) COLMAP

(b) Ours

Figure 6: **Comparison with COLMAP [5]:** a state-of-the-art MVS algorithm for static scenes fails to reconstruct images undergoing non-rigid motion (Fig. 4).

## References

- [1] Agisoft. PhotoScan: MVS software, 2000–2004. 2
- [2] Y. Dai, H. Li, and M. He. A simple prior-free method for non-rigid structure-from-motion factorization. *International Journal of Computer Vision*, 107(2):101–122, 2014. 3
- [3] H. Li, B. Adams, L. J. Guibas, and M. Pauly. Robust single-view geometry and motion reconstruction. In *ACM Trans. on Graphics (SIGGRAPH Asia)*, pages 175:1–175:10, 2009. 3
- [4] D. G. Lowe. Object recognition from local scale-invariant features. In *Intl. Conf. on Computer Vision (ICCV)*, 1999. 2
- [5] J. L. Schönberger, E. Zheng, M. Pollefeys, and J.-M. Frahm. Pixelwise view selection for unstructured multi-view stereo.

In *European Conference on Computer Vision (ECCV)*, 2016.  
1, 3

- [6] T. Schöps, J. L. Schönberger, S. Galliani, T. Sattler, K. Schindler, M. Pollefeys, and A. Geiger. A multi-view stereo benchmark with high-resolution images and multi-camera videos. In *IEEE Conf. on Computer Vision and Pattern Recognition (CVPR)*, 2017. 3
